# Supplementary material
Source: HighWire-hosted journal article supplement (http://www.cmaj.ca/highwire/filestream/59168/field_highwire_adjunct_files/2/birth-urquia-3-at.pdf)
Supplement: birth-urquia-3-at.pdf [file birth-urquia-3-at.pdf]

**Appendix 3: Adverse neonatal outcomes among 328 387 singleton live births to immigrant women according to the method used to classify infants as small for gestational age (SGA) (< 10th percentile)**

**Green** = infants classified as SGA according to the birth-weight curve for newborns of Canadian-born women but not according to the birth-weight curve for newborns of women from their respective world region of origin

**Blue** = infants classified as SGA on both curves

**Black** = infants classified as not SGA on either curve

| Outcome                                  | Not SGA on either curve<br>(n = 274 176) | SGA on Canadian curve only<br>(n = 20 431) | SGA on both curves<br>(n = 33 780) | SGA on Canadian curve only v. not SGA on either curve |                               | SGA on both curves v. not SGA on either curve |                               |
|------------------------------------------|------------------------------------------|--------------------------------------------|------------------------------------|-------------------------------------------------------|-------------------------------|-----------------------------------------------|-------------------------------|
|                                          | No. events<br>(rate per 1000)            | No. events<br>(rate per 1000)              | No. events<br>(rate per 1000)      | Crude odds ratio<br>(95% CI)                          | Adjusted odds ratio (95% CI)* | Crude odds ratio<br>(95% CI)                  | Adjusted odds ratio (95% CI)* |
| Neonatal death                           |                                          |                                            |                                    |                                                       |                               |                                               |                               |
| All infants                              | 191 (0.7)                                | 23 (1.1)                                   | 343 (10.2)                         | 1.62 (1.05 to 2.49)                                   | 1.60 (1.04 to 2.48)           | 14.72 (12.32 to 17.57)                        | 14.74 (12.32 to 17.64)        |
| Preterm infants born at 23–36 weeks      | 72 (4.9)                                 | 8 (8.9)                                    | 278 (77.8)                         | 1.81 (0.87 to 3.77)                                   | 1.85 (0.89 to 3.86)           | 17.07 (13.13 to 22.18)                        | 17.14 (13.16 to 22.32)        |
| Term infants born at 37–41 weeks         | 119 (0.5)                                | 15 (0.8)                                   | 65 (2.2)                           | 1.68 (0.98 to 2.87)                                   | 1.56 (0.90 to 2.69)           | 4.70 (3.47 to 6.36)                           | 4.60 (3.39 to 6.26)           |
| Newborn hospital length of stay ≥ 7 days | 6959 (25.4)                              | 683 (33.4)                                 | 3239 (95.9)                        | 1.26 (1.17 to 1.35)                                   | 1.22 (1.12 to 1.32)           | 3.71 (3.57 to 3.86)                           | 3.89 (3.72 to 4.06)           |
| Admission to NICU                        | 31 868 (116.2)                           | 2758 (135.0)                               | 8116 (240.3)                       | 1.19 (1.14 to 1.24)                                   | 0.99 (0.95 to 1.04)           | 2.41 (2.34 to 2.47)                           | 2.27 (2.21 to 2.34)           |
| Mechanical ventilation                   | 4907 (17.9)                              | 307 (15.0)                                 | 2037 (60.3)                        | 0.84 (0.75 to 0.94)                                   | 0.88 (0.78 to 0.98)           | 3.52 (3.34 to 3.71)                           | 3.37 (3.20 to 3.56)           |
| Intrauterine hypoxia or birth asphyxia   | 1338 (4.9)                               | 101 (4.9)                                  | 293 (8.7)                          | 1.01 (0.83 to 1.24)                                   | 0.94 (0.76 to 1.15)           | 1.78 (1.57 to 2.03)                           | 1.61 (1.42 to 1.84)           |

Note: CI = confidence interval, NICU = neonatal intensive care unit.

\*Adjusted for maternal age, parity, year of delivery, maternal education, marital status, refugee status, knowledge of Canadian languages, duration of residence in Canada, world region of origin and neighborhood income quintile.
